# Supplementary material
Source: PubMed Central journal article supplement (PMC3413165)
Supplement: supp_dev.073122_DEV073122TableS1.pdf [file supp_dev.073122_DEV073122TableS1.pdf]

**Table S1. List of identified proteins that decreased or increased in *EIF4E-3* mutant testes by at least 1.5-fold**

|                                    | Gene     | t-test               | Average ratio | Annotation                               |
|------------------------------------|----------|----------------------|---------------|------------------------------------------|
| Decreased in <i>EIF4E-3</i> mutant | CG1979   | $2.8 \times 10^{-6}$ | -1.92         | Unknown                                  |
|                                    | CG1516   | $2.3 \times 10^{-4}$ | -1.7          | Pyruvate carboxylase                     |
|                                    | CG4706   | 0.0006               | -1.8          | Aconitase dehydratase                    |
|                                    | CG6778   | $4.0 \times 10^{-5}$ | -2.45         | Glycyl-tRNA synthetase                   |
|                                    | Pgd      | 0.0004               | -1.76         | 6-phosphogluconate dehydrogenase         |
|                                    | CG18284  | $8.9 \times 10^{-5}$ | -2.09         | Lipase                                   |
|                                    | CG11963  | 0.0003               | -1.87         | Succinyl-CoA synthetase                  |
|                                    | CG17654  | 0.0006               | -2.3          | Enolase                                  |
|                                    | Hex-A    | $6.1 \times 10^{-6}$ | -3.04         | Hexokinase                               |
|                                    | CG32820  | $2.0 \times 10^{-7}$ | -5.78         | Teklin (microtubule organization)        |
|                                    | CG5432   | 0.001                | -2.07         | Fructose biphosphate aldolase            |
|                                    | CG12020  | $1.9 \times 10^{-5}$ | -1.76         | Dnaj type chaperone                      |
|                                    | CG6058   | 0.0002               | -3.57         | Aldolase                                 |
|                                    | CG10863  | 0.0009               | -1.86         | Alditol:NADP <sup>+</sup> oxidoreductase |
|                                    | CG16758  | 0.0004               | -1.79         | Inosine-guanosine xanthine phosphatase   |
|                                    | CG11876  | 0.0007               | -1.95         | Pyruvate dehydrogenase                   |
|                                    | CG4546   | 0.0004               | -1.81         | Arginine kinase                          |
| Increased in <i>EIF4E-3</i> mutant | Tom70    | 0.0022               | 1.91          | Mitochondrial transmembrane transporter  |
|                                    | blw      | 0.0017               | 1.84          | Mitochondrial ATP synthase subunit       |
|                                    | ldh      | 0.0001               | 1.72          | Isocitrate dehydrogenase                 |
|                                    | CG5851   | 0.0006               | 4.42          | Sds22, protein phosphatase               |
|                                    | CG10749  | 0.0003               | 1.51          | Malate dehydrogenase                     |
|                                    | CG5730   | $6.4 \times 10^{-5}$ | 1.75          | Annexin IX                               |
|                                    | Aats-thr | 0.0015               | 1.9           | Threonyl-tRNA synthetase                 |
